# Supplementary material for: Silicon cycled by tropical forest trees: effects of species, elevation and bedrock on Mount Kinabalu, Malaysia
Source: Copernicus journal article supplement (doi:10.5194/bg-2018-447), 2018-11-22
Supplement: Supplementary file 1 [file bg-2018-447-supplement.pdf]

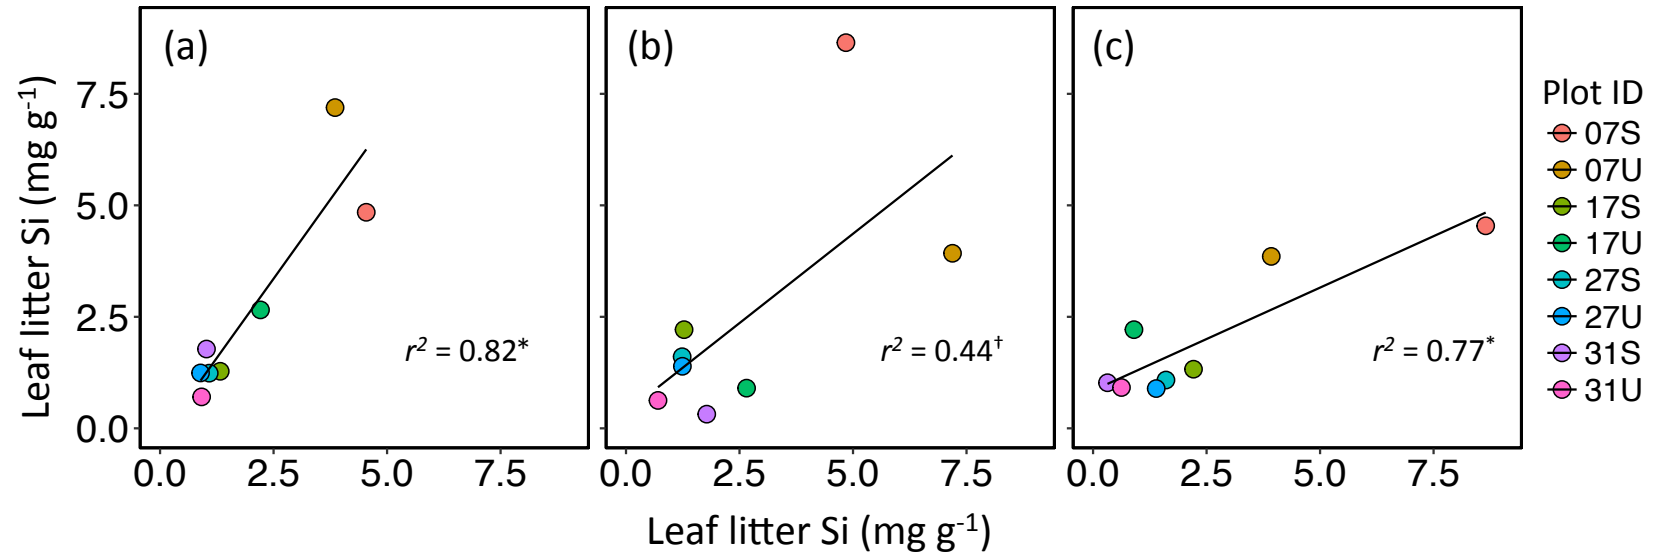

Figure S1. Linear relationships between leaf litter Si contents among different collection times. (a) May 1998 as a function of April 1997, (b) August 1998 as a function of May 1998 and (c) April 1997 as a function of August 1998. See Figure 2 for Plot ID in the legend. <sup>†</sup> $P < 0.1$ , <sup>\*</sup> $P < 0.05$ .





Table S1. The list of 71 species included in the study, and their relative basal area of stems  $\geq 10$  cm dbh (RBA, %) in eight plots. The ID number is given in Fig. 2. The plot ID indicates elevation and bedrock type: 07S, 17S, 27S and 31S indicate 700, 1,700, 2,700 and 3,100 m elevation on sedimentary rock, respectively, and 07U, 17U, 27U and 31U indicate 700, 1,700, 2,700 and 3,100 m elevation on ultrabasic rock, respectively. Species occurring at multiple plots are highlighted in yellow.

| ID | Family           | Species                       | 07S    | 07U    | 17S    | 17U    | 27S     | 27U    | 31S    | 31U     |
|----|------------------|-------------------------------|--------|--------|--------|--------|---------|--------|--------|---------|
|    |                  |                               | 1.0 ha | 1.0 ha | 1.0 ha | 0.2 ha | 0.25 ha | 0.2 ha | 0.2 ha | 0.06 ha |
| 1  | Annonaceae       | <i>Cyathocalyx magnificus</i> | -      | 1.5    | -      | -      | -       | -      | -      | -       |
| 2  | Aquifoliaceae    | <i>Ilex zygophylla</i>        | -      | -      | -      | -      | 8.2     | -      | 5.9    | -       |
| 3  | Araucariaceae    | <i>Agathis borneensis</i>     | -      | 3.5    | -      | -      | -       | -      | -      | -       |
| 4  | Araucariaceae    | <i>Agathis kinabaluensis</i>  | -      | -      | -      | 19.2   | -       | -      | -      | -       |
| 5  | Bombacaceae      | <i>Coelostegia griffithii</i> | -      | 2.9    | -      | -      | -       | -      | -      | -       |
| 6  | Burseraceae      | <i>Dacryodes costata</i>      | -      | 4.2    | -      | -      | -       | -      | -      | -       |
| 7  | Celastraceae     | <i>Bhesa paniculata</i>       | -      | -      | 1.3    | -      | -       | -      | -      | -       |
| 8  | Cunoniaceae      | <i>Weinmannia cf. blumei</i>  | -      | -      | -      | 3.9    | -       | -      | -      | -       |
| 9  | Dipterocarpaceae | <i>Shorea argentifolia</i>    | 6.4    | -      | -      | -      | -       | -      | -      | -       |
| 10 | Dipterocarpaceae | <i>Shorea gibbosa</i>         | -      | 1.9    | -      | -      | -       | -      | -      | -       |
| 11 | Dipterocarpaceae | <i>Shorea hopeifolia</i>      | 4.4    | -      | -      | -      | -       | -      | -      | -       |
| 12 | Dipterocarpaceae | <i>Shorea laevis</i>          | -      | 30.5   | -      | -      | -       | -      | -      | -       |

|    |                  |                                 |     |     |     |     |      |     |     |   |
|----|------------------|---------------------------------|-----|-----|-----|-----|------|-----|-----|---|
| 13 | Dipterocarpaceae | <i>Shorea leprosula</i>         | 7.3 | -   | -   | -   | -    | -   | -   | - |
| 14 | Dipterocarpaceae | <i>Shorea parvistipulata</i>    | 4.5 | 3.1 | -   | -   | -    | -   | -   | - |
| 15 | Escalloniaceae   | <i>Polyosma hookeri</i>         | -   | -   | -   | -   | -    | 2.8 | 5.1 | - |
| 16 | Fagaceae         | <i>Castanopsis javanica</i>     | 4.3 | -   | -   | -   | -    | -   | -   | - |
| 17 | Fagaceae         | <i>Lithocarpus clementianus</i> | -   | -   | 4.6 | -   | -    | -   | -   | - |
| 18 | Fagaceae         | <i>Lithocarpus hatusimae</i>    | -   | -   | 2.5 | -   | -    | -   | -   | - |
| 19 | Fagaceae         | <i>Lithocarpus havilandii</i>   | -   | -   | -   | -   | 8.2  | -   | -   | - |
| 20 | Fagaceae         | <i>Lithocarpus lampadarius</i>  | -   | -   | 1.7 | -   | -    | -   | -   | - |
| 21 | Fagaceae         | <i>Lithocarpus rigidus</i>      | -   | -   | -   | 2.3 | -    | -   | -   | - |
| 22 | Fagaceae         | <i>Quercus lowii</i>            | -   | -   | -   | 3.3 | -    | -   | -   | - |
| 23 | Guttiferae       | <i>Garcinia multinervia</i>     | -   | -   | 1.5 | -   | -    | -   | -   | - |
| 24 | Guttiferae       | <i>Garcinia ramiflora</i>       | -   | -   | 2.7 | -   | -    | -   | -   | - |
| 25 | Ixonanthaceae    | <i>Ixonanthes reticulata</i>    | 8.0 | -   | -   | -   | -    | -   | -   | - |
| 26 | Lauraceae        | <i>Cinnamomum parthenoxylon</i> | 2.4 | -   | -   | -   | -    | -   | -   | - |
| 27 | Lauraceae        | <i>Litsea cf. brachystachya</i> | 2.8 | -   | -   | -   | -    | -   | -   | - |
| 28 | Leguminosae      | <i>Dialium indum</i>            | 1.8 | -   | -   | -   | -    | -   | -   | - |
| 29 | Leguminosae      | <i>Koompassia malaccensis</i>   | -   | 2.2 | -   | -   | -    | -   | -   | - |
| 30 | Loganiaceae      | <i>Norrisia major</i>           | 3.5 | -   | -   | -   | -    | -   | -   | - |
| 31 | Magnoliaceae     | <i>Magnolia carsonii</i>        | -   | -   | -   | -   | 18.3 | -   | -   | - |
| 32 | Magnoliaceae     | <i>Manglietia dolichogyna</i>   | 2.2 | -   | -   | -   | -    | -   | -   | - |
| 33 | Meliaceae        | <i>Aglaia squamulosa</i>        | -   | -   | 2.9 | -   | -    | -   | -   | - |
| 34 | Meliaceae        | <i>Dysoxylum cyrtobotryum</i>   | -   | -   | 1.4 | -   | -    | -   | -   | - |

|    |                 |                                    |     |     |     |      |      |      |      |      |
|----|-----------------|------------------------------------|-----|-----|-----|------|------|------|------|------|
| 35 | Meliaceae       | <i>Dysoxylum excelsum</i>          | -   | 2.0 | -   | -    | -    | -    | -    | -    |
| 36 | Meliaceae       | <i>Sandoricum koetjape</i>         | 3.1 | -   | -   | -    | -    | -    | -    | -    |
| 37 | Myrtaceae       | <i>Leptospermum recurvum</i>       | -   | -   | -   | -    | -    | 21.6 | 6.9  | 89.4 |
| 38 | Myrtaceae       | <i>Syzygium cf. tawahense</i>      | -   | 1.9 | -   | -    | -    | -    | -    | -    |
| 39 | Myrtaceae       | <i>Syzygium chrysanthum</i>        | -   | -   | 3.1 | -    | -    | -    | -    | -    |
| 40 | Myrtaceae       | <i>Syzygium fastigiatum</i>        | 2.0 | -   | -   | -    | -    | -    | -    | -    |
| 41 | Myrtaceae       | <i>Syzygium houttuynii</i>         | -   | -   | -   | -    | -    | -    | 10.4 | -    |
| 42 | Myrtaceae       | <i>Syzygium kinabaluense</i>       | -   | -   | -   | -    | -    | -    | 6.8  | -    |
| 43 | Myrtaceae       | <i>Syzygium napiforme</i>          | -   | -   | 3.4 | -    | -    | -    | -    | -    |
| 44 | Myrtaceae       | <i>Syzygium pachysepalum</i>       | -   | -   | 5.0 | -    | -    | -    | -    | -    |
| 45 | Myrtaceae       | <i>Syzygium punctilimbum</i>       | -   | -   | -   | -    | 40.7 | -    | -    | -    |
| 46 | Myrtaceae       | <i>Syzygium steenisii</i>          | -   | -   | -   | -    | -    | 4.6  | -    | -    |
| 47 | Myrtaceae       | <i>Syzygium subdecussatum</i>      | -   | -   | -   | 2.1  | -    | -    | -    | -    |
| 48 | Myrtaceae       | <i>Tristania sp.1</i>              | -   | -   | 4.3 | -    | -    | -    | -    | -    |
| 49 | Myrtaceae       | <i>Tristania sp.2</i>              | 3.0 | -   | -   | -    | -    | -    | -    | -    |
| 50 | Myrtaceae       | <i>Tristaniopsis cf. elliptica</i> | -   | -   | -   | 31.4 | -    | -    | -    | -    |
| 51 | Myrtaceae       | <i>Tristaniopsis clementis</i>     | -   | -   | 6.9 | -    | -    | -    | -    | -    |
| 52 | Myrtaceae       | <i>Tristaniopsis elliptica</i>     | -   | -   | -   | -    | -    | 6.8  | -    | -    |
| 53 | Oleaceae        | <i>Olea decussata</i>              | -   | -   | -   | -    | 9.1  | -    | -    | -    |
| 54 | Phyllocladaceae | <i>Phyllocladus hypophyllus</i>    | -   | -   | 1.8 | -    | 7.9  | -    | -    | 1.3  |
| 55 | Podocarpaceae   | <i>Dacrycarpus imbricatus</i>      | -   | -   | 5.7 | -    | -    | -    | -    | -    |
| 56 | Podocarpaceae   | <i>Dacrycarpus kinabaluensis</i>   | -   | -   | -   | -    | -    | 19.1 | 36.3 | 7.5  |

|           |               |                                  |      |      |      |      |      |      |      |      |
|-----------|---------------|----------------------------------|------|------|------|------|------|------|------|------|
| 57        | Podocarpaceae | <i>Dacrydium gibbsiae</i>        | -    | -    | -    | -    | -    | 32.5 | -    | 1.7  |
| 58        | Podocarpaceae | <i>Dacrydium pectinatum</i>      | -    | -    | 5.9  | 4.0  | -    | -    | -    | -    |
| 59        | Podocarpaceae | <i>Podocarpus gibbsii</i>        | -    | -    | -    | 6.8  | -    | -    | -    | -    |
| 60        | Polygalaceae  | <i>Xanthophyllum tenue</i>       | -    | -    | -    | 6.9  | -    | -    | -    | -    |
| 61        | Sapotaceae    | <i>Palaquium gutta</i>           | -    | -    | 1.6  | -    | -    | -    | -    | -    |
| 62        | Sapotaceae    | <i>Palaquium herveyi</i>         | -    | 2.3  | -    | -    | -    | -    | -    | -    |
| 63        | Sapotaceae    | <i>Payena microphylla</i>        | 6.7  | -    | 6.2  | -    | -    | -    | -    | -    |
| 64        | Sterculiaceae | <i>Heritiera simplicifolia</i>   | -    | 2.6  | -    | -    | -    | -    | -    | -    |
| 65        | Sterculiaceae | <i>Scaphium macropodum</i>       | -    | 2.5  | -    | -    | -    | -    | -    | -    |
| 66        | Symplocaceae  | <i>Symplocos buxifolia</i>       | -    | -    | -    | -    | -    | -    | 3.9  | -    |
| 67        | Symplocaceae  | <i>Symplocos pendula</i>         | -    | -    | -    | -    | -    | 1.3  | 2.5  | -    |
| 68        | Theaceae      | <i>Schima brevifolia</i>         | -    | -    | -    | -    | -    | 7.2  | 10.0 | -    |
| 69        | Theaceae      | <i>Ternstroemia lowii</i>        | -    | -    | -    | -    | -    | -    | 4.2  | -    |
| 70        | Thymelaeaceae | <i>Aquilaria malaccensis</i>     | -    | 3.4  | -    | -    | -    | -    | -    | -    |
| 71        | Trigoniaceae  | <i>Trigoniasstrum hypoleucum</i> | -    | 1.3  | -    | -    | -    | -    | -    | -    |
| Total RBA |               |                                  | 62.4 | 65.8 | 62.5 | 79.9 | 92.4 | 95.9 | 92   | 99.9 |

Table S2. Plot-and-species mean leaf Si concentration for the 71 tree species from 28 families. The ID number is used in Fig 2. Mean leaf Si concentration was found by averaging at least three replicates per species except  $n = 1$  for *Shorea parvistipulata* (No.14) on ultrabasic rock, *Tristania* sp.2 (No.44) and *Heritiera simplicifolia* (No.64) (indicated by asterisk). Species occurring at multiple plots are highlighted in yellow.

| ID | Family           | Species                       | 07S    | 07U    | 17S    | 17U    | 27S     | 27U    | 31S    | 31U     |
|----|------------------|-------------------------------|--------|--------|--------|--------|---------|--------|--------|---------|
|    |                  |                               | 1.0 ha | 1.0 ha | 1.0 ha | 0.2 ha | 0.25 ha | 0.2 ha | 0.2 ha | 0.06 ha |
| 1  | Annonaceae       | <i>Cyathocalyx magnificus</i> | -      | 8.61   | -      | -      | -       | -      | -      | -       |
| 2  | Aquifoliaceae    | <i>Ilex zygophylla</i>        | -      | -      | -      | -      | 0.61    | -      | 0.98   | -       |
| 3  | Araucariaceae    | <i>Agathis borneensis</i>     | -      | 0.57   | -      | -      | -       | -      | -      | -       |
| 4  | Araucariaceae    | <i>Agathis kinabaluensis</i>  | -      | -      | -      | 0.62   | -       | -      | -      | -       |
| 5  | Bombacaceae      | <i>Coelostegia griffithii</i> | -      | 6.13   | -      | -      | -       | -      | -      | -       |
| 6  | Burseraceae      | <i>Dacryodes costata</i>      | -      | 13.59  | -      | -      | -       | -      | -      | -       |
| 7  | Celastraceae     | <i>Bhesa paniculata</i>       | -      | -      | 2.69   | -      | -       | -      | -      | -       |
| 8  | Cunoniaceae      | <i>Weinmannia cf. blumei</i>  | -      | -      | -      | 1.97   | -       | -      | -      | -       |
| 9  | Dipterocarpaceae | <i>Shorea argentifolia</i>    | 0.70   | -      | -      | -      | -       | -      | -      | -       |
| 10 | Dipterocarpaceae | <i>Shorea gibbosa</i>         | -      | 9.87   | -      | -      | -       | -      | -      | -       |
| 11 | Dipterocarpaceae | <i>Shorea hopeifolia</i>      | 1.25   | -      | -      | -      | -       | -      | -      | -       |
| 12 | Dipterocarpaceae | <i>Shorea laevis</i>          | -      | 0.64   | -      | -      | -       | -      | -      | -       |



|    |                  |                                 |       |       |      |      |      |      |      |   |
|----|------------------|---------------------------------|-------|-------|------|------|------|------|------|---|
| 13 | Dipterocarpaceae | <i>Shorea leprosula</i>         | 0.51  | -     | -    | -    | -    | -    | -    | - |
| 14 | Dipterocarpaceae | <i>Shorea parvistipulata</i>    | 0.46  | 0.85* | -    | -    | -    | -    | -    | - |
| 15 | Escalloniaceae   | <i>Polyosma hookeri</i>         | -     | -     | -    | -    | -    | 1.31 | 1.78 | - |
| 16 | Fagaceae         | <i>Castanopsis javanica</i>     | 7.16  | -     | -    | -    | -    | -    | -    | - |
| 17 | Fagaceae         | <i>Lithocarpus clementianus</i> | -     | -     | 1.29 | -    | -    | -    | -    | - |
| 18 | Fagaceae         | <i>Lithocarpus hatusimae</i>    | -     | -     | 0.51 | -    | -    | -    | -    | - |
| 19 | Fagaceae         | <i>Lithocarpus havilandii</i>   | -     | -     | -    | -    | 0.54 | -    | -    | - |
| 20 | Fagaceae         | <i>Lithocarpus lampadarius</i>  | -     | -     | 0.79 | -    | -    | -    | -    | - |
| 21 | Fagaceae         | <i>Lithocarpus rigidus</i>      | -     | -     | -    | 0.55 | -    | -    | -    | - |
| 22 | Fagaceae         | <i>Quercus lowii</i>            | -     | -     | -    | 4.73 | -    | -    | -    | - |
| 23 | Guttiferae       | <i>Garcinia multinervia</i>     | -     | -     | 0.57 | -    | -    | -    | -    | - |
| 24 | Guttiferae       | <i>Garcinia ramiflora</i>       | -     | -     | 0.50 | -    | -    | -    | -    | - |
| 25 | Ixonanthaceae    | <i>Ixonanthes reticulata</i>    | 1.25  | -     | -    | -    | -    | -    | -    | - |
| 26 | Lauraceae        | <i>Cinnamomum parthenoxylon</i> | 0.50  | -     | -    | -    | -    | -    | -    | - |
| 27 | Lauraceae        | <i>Litsea cf. brachystachya</i> | 0.67  | -     | -    | -    | -    | -    | -    | - |
| 28 | Leguminosae      | <i>Dialium indum</i>            | 8.47  | -     | -    | -    | -    | -    | -    | - |
| 29 | Leguminosae      | <i>Koompassia malaccensis</i>   | -     | 0.42  | -    | -    | -    | -    | -    | - |
| 30 | Loganiaceae      | <i>Norrisia major</i>           | 5.73  | -     | -    | -    | -    | -    | -    | - |
| 31 | Magnoliaceae     | <i>Magnolia carsonii</i>        | -     | -     | -    | -    | 3.07 | -    | -    | - |
| 32 | Magnoliaceae     | <i>Manglietia dolichogyna</i>   | 11.38 | -     | -    | -    | -    | -    | -    | - |
| 33 | Meliaceae        | <i>Aglaia squamulosa</i>        | -     | -     | 0.91 | -    | -    | -    | -    | - |
| 34 | Meliaceae        | <i>Dysoxylum cyrtobotryum</i>   | -     | -     | 0.59 | -    | -    | -    | -    | - |

|    |                 |                                    |       |      |      |      |      |      |      |      |
|----|-----------------|------------------------------------|-------|------|------|------|------|------|------|------|
| 35 | Meliaceae       | <i>Dysoxylum excelsum</i>          | -     | 0.59 | -    | -    | -    | -    | -    | -    |
| 36 | Meliaceae       | <i>Sandoricum koetjape</i>         | 4.23  | -    | -    | -    | -    | -    | -    | -    |
| 37 | Myrtaceae       | <i>Leptospermum recurvum</i>       | -     | -    | -    | -    | -    | 0.30 | 0.49 | 0.32 |
| 38 | Myrtaceae       | <i>Syzygium cf. tawahense</i>      | -     | 2.27 | -    | -    | -    | -    | -    | -    |
| 39 | Myrtaceae       | <i>Syzygium chrysanthum</i>        | -     | -    | 0.90 | -    | -    | -    | -    | -    |
| 40 | Myrtaceae       | <i>Syzygium fastigiatum</i>        | 7.15  | -    | -    | -    | -    | -    | -    | -    |
| 41 | Myrtaceae       | <i>Syzygium houttuynii</i>         | -     | -    | -    | -    | -    | -    | 2.80 | -    |
| 42 | Myrtaceae       | <i>Syzygium kinabaluense</i>       | -     | -    | -    | -    | -    | -    | 0.87 | -    |
| 43 | Myrtaceae       | <i>Syzygium napiforme</i>          | -     | -    | 3.24 | -    | -    | -    | -    | -    |
| 44 | Myrtaceae       | <i>Syzygium pachysepalum</i>       | -     | -    | 0.66 | -    | -    | -    | -    | -    |
| 45 | Myrtaceae       | <i>Syzygium punctilimbum</i>       | -     | -    | -    | -    | 0.75 | -    | -    | -    |
| 46 | Myrtaceae       | <i>Syzygium steenisii</i>          | -     | -    | -    | -    | -    | 0.79 | -    | -    |
| 47 | Myrtaceae       | <i>Syzygium subdecussatum</i>      | -     | -    | -    | 0.82 | -    | -    | -    | -    |
| 48 | Myrtaceae       | <i>Tristania sp.1</i>              | -     | -    | 0.43 | -    | -    | -    | -    | -    |
| 49 | Myrtaceae       | <i>Tristania sp.2</i>              | 1.07* | -    | -    | -    | -    | -    | -    | -    |
| 50 | Myrtaceae       | <i>Tristaniopsis cf. elliptica</i> | -     | -    | -    | 1.44 | -    | -    | -    | -    |
| 51 | Myrtaceae       | <i>Tristaniopsis clementis</i>     | -     | -    | 0.65 | -    | -    | -    | -    | -    |
| 52 | Myrtaceae       | <i>Tristaniopsis elliptica</i>     | -     | -    | -    | -    | -    | 0.50 | -    | -    |
| 53 | Oleaceae        | <i>Olea decussata</i>              | -     | -    | -    | -    | 0.42 | -    | -    | -    |
| 54 | Phyllocladaceae | <i>Phyllocladus hypophyllus</i>    | -     | -    | 0.80 | -    | 0.89 | -    | -    | 0.68 |
| 55 | Podocarpaceae   | <i>Dacrycarpus imbricatus</i>      | -     | -    | 0.74 | -    | -    | -    | -    | -    |
| 56 | Podocarpaceae   | <i>Dacrycarpus kinabaluensis</i>   | -     | -    | -    | -    | -    | 0.60 | 0.78 | 0.57 |

|    |               |                                 |      |       |      |      |   |      |      |      |
|----|---------------|---------------------------------|------|-------|------|------|---|------|------|------|
| 57 | Podocarpaceae | <i>Dacrydium gibbsiae</i>       | -    | -     | -    | -    | - | 0.27 | -    | 0.47 |
| 58 | Podocarpaceae | <i>Dacrydium pectinatum</i>     | -    | -     | 0.92 | 0.46 | - | -    | -    | -    |
| 59 | Podocarpaceae | <i>Podocarpus gibbsii</i>       | -    | -     | -    | 0.24 | - | -    | -    | -    |
| 60 | Polygalaceae  | <i>Xanthophyllum tenue</i>      | -    | -     | -    | 3.06 | - | -    | -    | -    |
| 61 | Sapotaceae    | <i>Palaquium gutta</i>          | -    | -     | 1.25 | -    | - | -    | -    | -    |
| 62 | Sapotaceae    | <i>Palaquium herveyi</i>        | -    | 2.40  | -    | -    | - | -    | -    | -    |
| 63 | Sapotaceae    | <i>Payena microphylla</i>       | 4.16 | -     | 1.53 | -    | - | -    | -    | -    |
| 64 | Sterculiaceae | <i>Heritiera simplicifolia</i>  | -    | 0.98* | -    | -    | - | -    | -    | -    |
| 65 | Sterculiaceae | <i>Scaphium macropodum</i>      | -    | 11.08 | -    | -    | - | -    | -    | -    |
| 66 | Symplocaceae  | <i>Symplocos buxifolia</i>      | -    | -     | -    | -    | - | -    | 0.80 | -    |
| 67 | Symplocaceae  | <i>Symplocos pendula</i>        | -    | -     | -    | -    | - | 0.51 | 0.72 | -    |
| 68 | Theaceae      | <i>Schima brevifolia</i>        | -    | -     | -    | -    | - | 1.00 | 1.48 | -    |
| 69 | Theaceae      | <i>Ternstroemia lowii</i>       | -    | -     | -    | -    | - | -    | 0.67 | -    |
| 70 | Thymelaeaceae | <i>Aquilaria malaccensis</i>    | -    | 3.74  | -    | -    | - | -    | -    | -    |
| 71 | Trigoniaceae  | <i>Trigoniastrum hypoleucum</i> | -    | 12.65 | -    | -    | - | -    | -    | -    |

---
